# Supplementary material for: Genome-wide association study of red blood cell traits in Hispanics/Latinos: The Hispanic Community Health Study/Study of Latinos
Source: PubMed Central journal article supplement (PMC5428979; doi:10.1371/journal.pgen.1006760), 2017-04-28

**Figure S1.** Manhattan Plots and accompanying QQ Plots for seven RBC Traits in 12,502 HCHS/SOL Hispanic/Latinos.

**Fig S1a.** Hematocrit

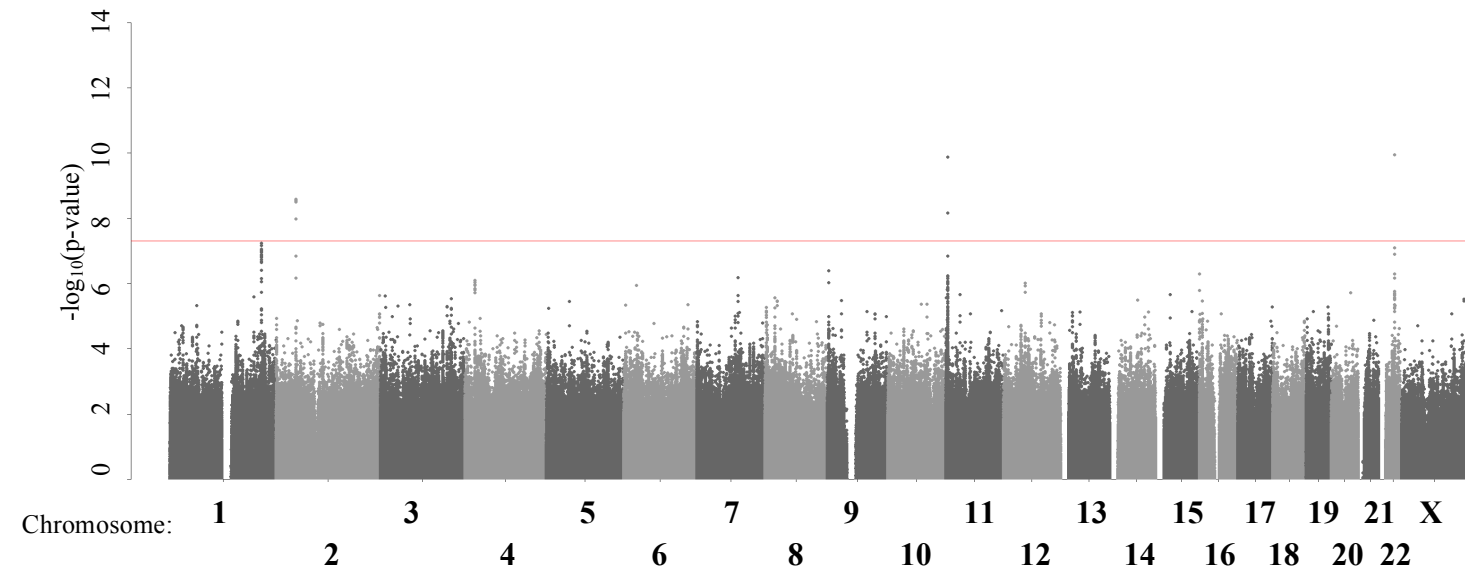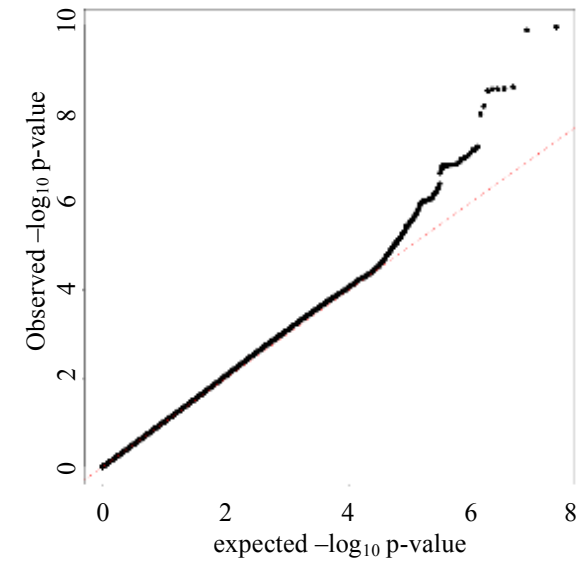

**Fig S1b.** Hemoglobin

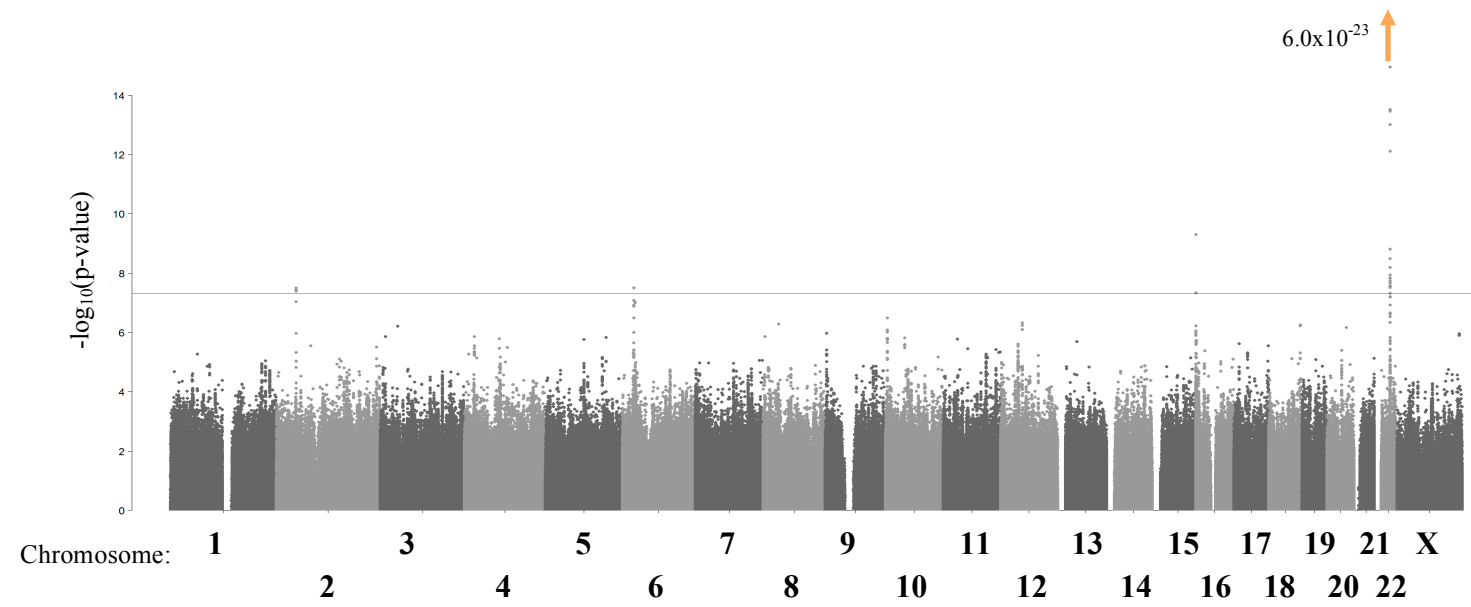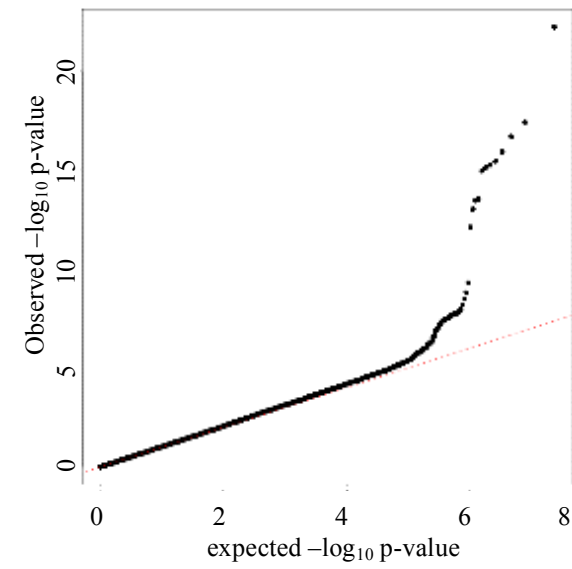

**Fig S1c.** Red Blood Cell Count

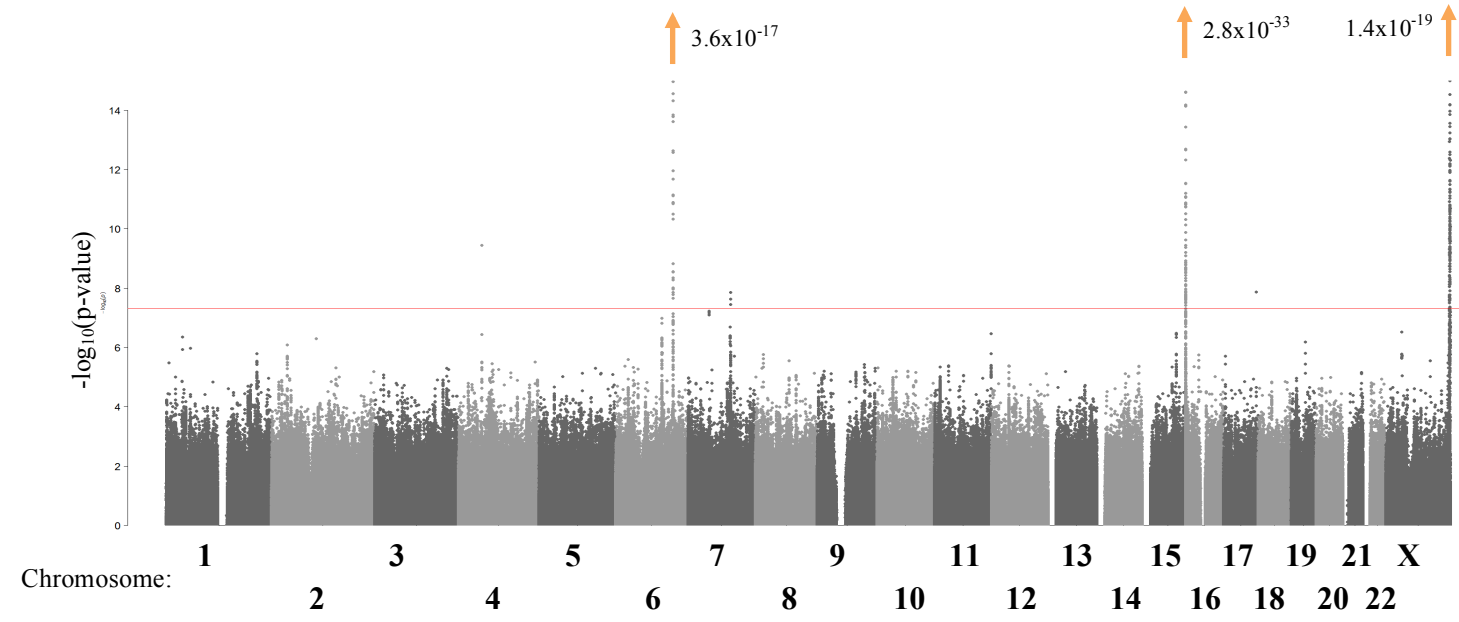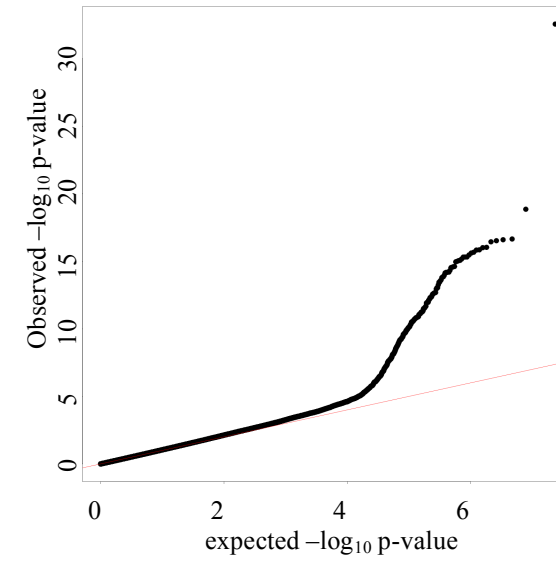

**Fig S1d.** Red Cell Distribution Width

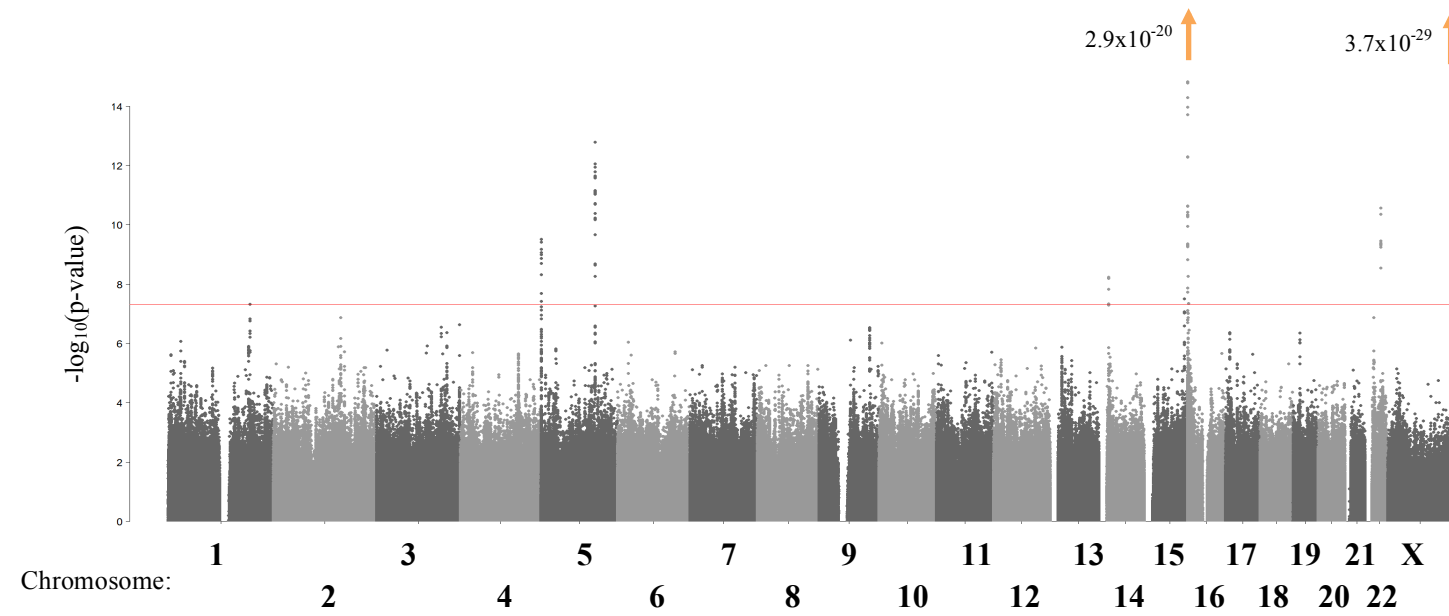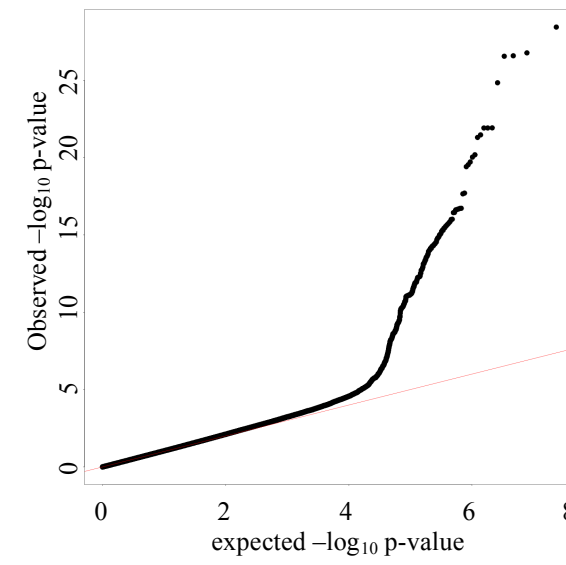

**Fig S1e.** Mean Corpuscular Hemoglobin

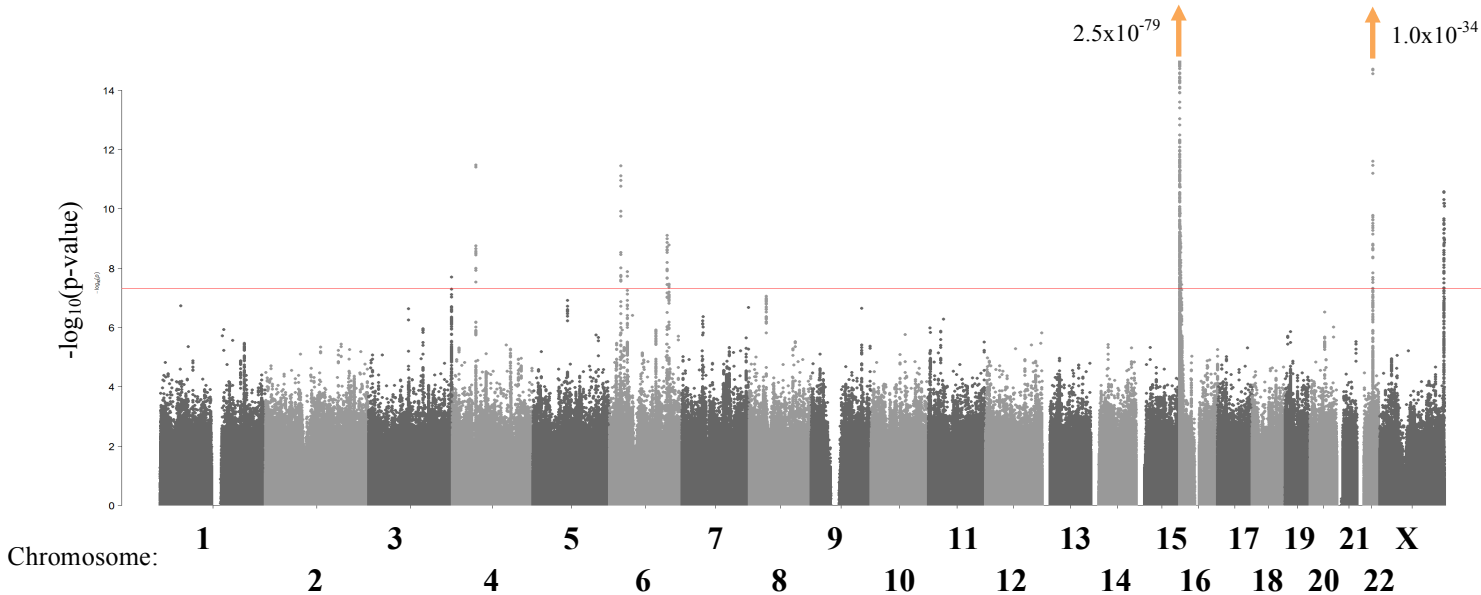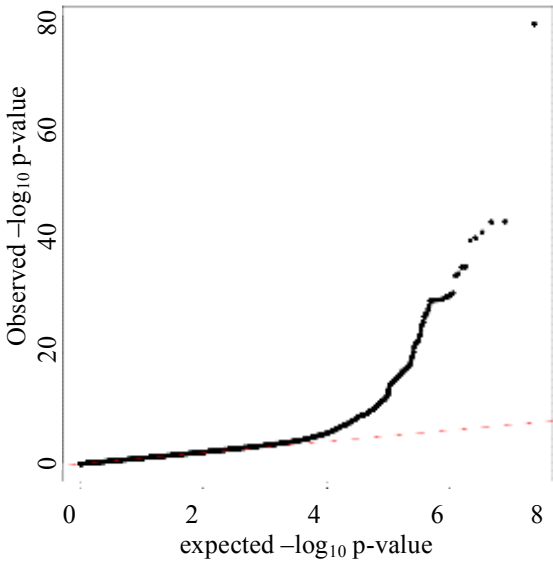

**Fig S1f.** Mean Corpuscular Hemoglobin Concentration

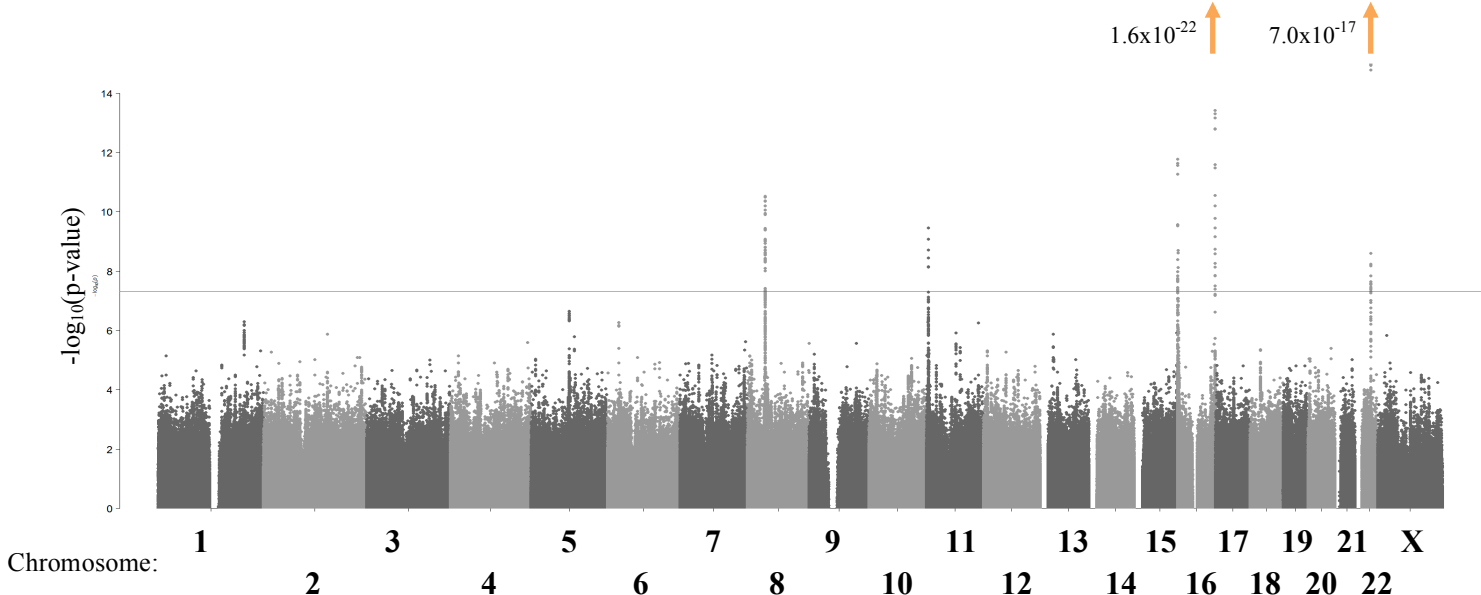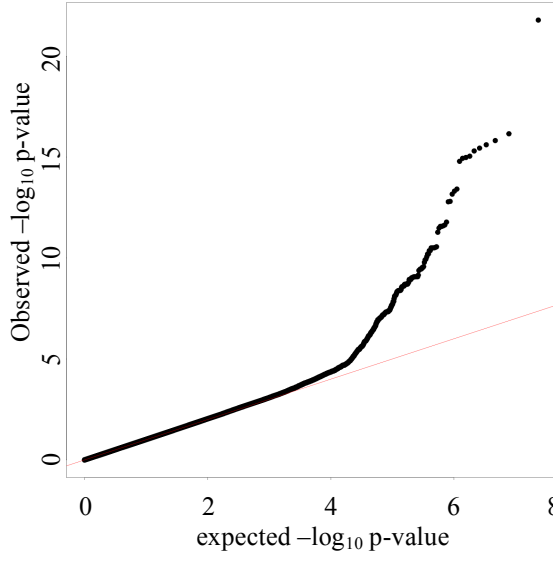

**Fig S1g.** Mean Corpuscular Volume

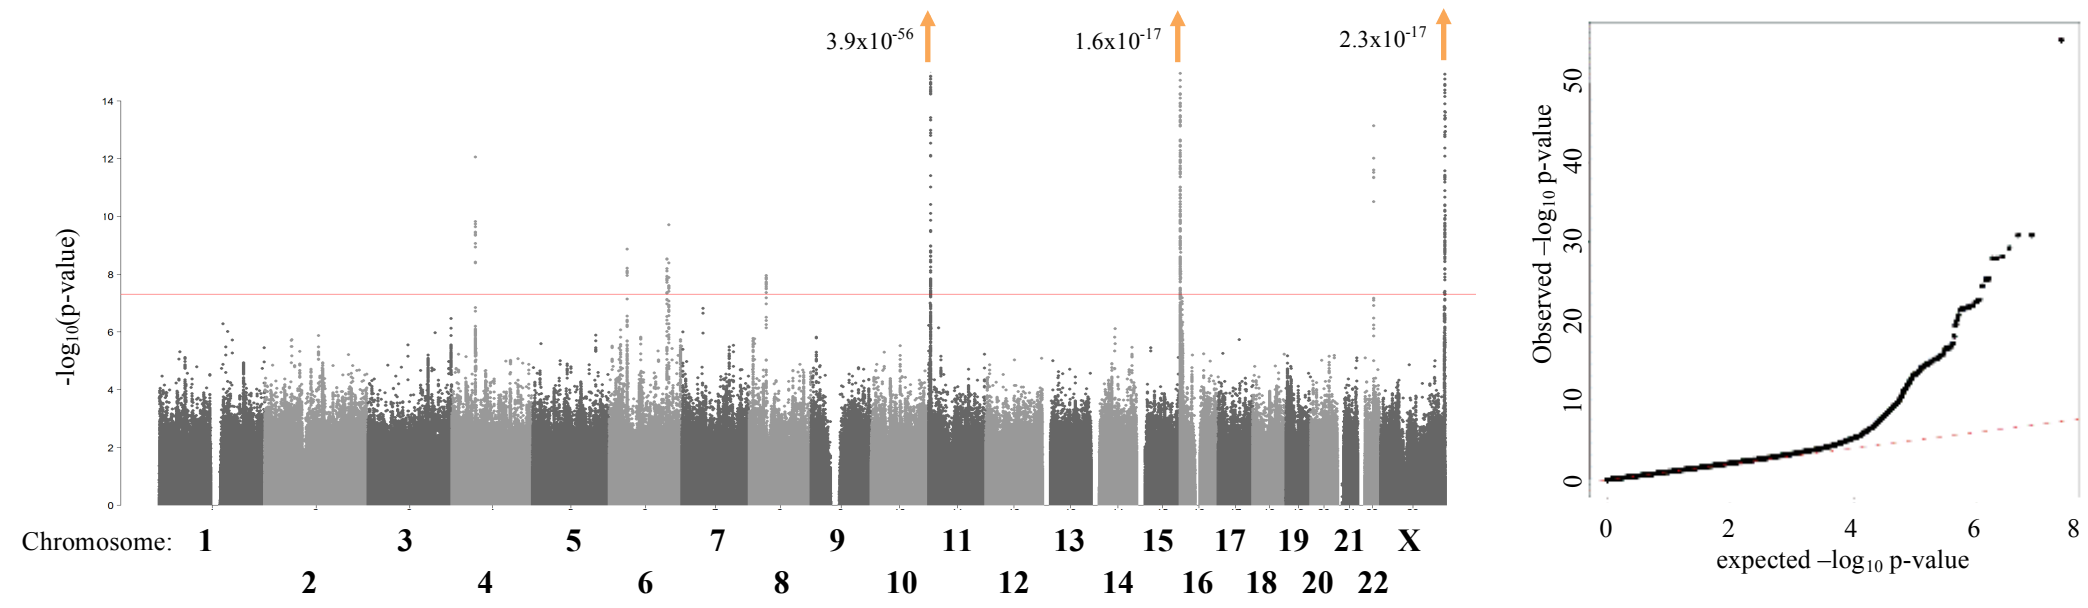

Supplement: pgen.1006760.s001.pdf [file pgen.1006760.s001.pdf]
